# Supplementary material
Source: PubMed Central journal article supplement (PMC8011586)
Supplement: NIHMS1679444-supplement-Supplemental_tables_and_charts.pdf [file NIHMS1679444-supplement-Supplemental_tables_and_charts.pdf]

## Appendix 1 - Main characteristics of health plan types

| Plan type                             | Patient incentive to use certain providers | Primary Care Physician (PCP) assigned | Referral from PCP to specialists required | Out of network services covered | Partially or fully capitated |
|---------------------------------------|--------------------------------------------|---------------------------------------|-------------------------------------------|---------------------------------|------------------------------|
| Comprehensive                         | No                                         | No                                    | n/a                                       | n/a                             | No                           |
| Health Maintenance Organization (HMO) | Yes                                        | Yes                                   | Yes                                       | No                              | Yes                          |
| Point-of –Service (POS):              | Yes                                        | Yes                                   | Yes                                       | Yes                             | Varies                       |
| Preferred Provider Organization (PPO) | Yes                                        | No                                    | n/a                                       | Yes                             | No                           |
| Consumer-Driven Health Plan (CDHP)    | Varies                                     | No                                    | n/a                                       | Varies                          | No                           |
| Exclusive Provider Organization (EPO) |                                            |                                       |                                           | No                              |                              |
| High Deductible Health Plan (HDHP)    | Varies                                     | No                                    | n/a                                       | Varies                          | No                           |

Source: MarketScan CCAE MDCR User Guide (2010), pp 19-20.

Appendix 2- ICD-9 and ICD-10 codes used to measure opioid abuse, dependence, and poisoning (diagnosed opioid-related morbidity)

|                            | <b>ICD-9-CM Code</b>                                  | <b>ICD-10-CM Code</b>                                                                                                                                                                                                                                                                                                                                                                    |
|----------------------------|-------------------------------------------------------|------------------------------------------------------------------------------------------------------------------------------------------------------------------------------------------------------------------------------------------------------------------------------------------------------------------------------------------------------------------------------------------|
| Opioid abuse               | 30550, 30551, 30552                                   | F1110, F11120, F11121, 11122, F11129, F1114, F11150, F11151, F11159, F11181, F11182, F11188, F1119                                                                                                                                                                                                                                                                                       |
| Opioid dependence          | 30400, 30401, 30402, 30470, 30471, 30472              | F1120, F11220, F11221, F11222, F11229, F1123, F1124, F11250, F11251, F11259, F11281, F11282, F11288, F1129                                                                                                                                                                                                                                                                               |
| Adverse effects of opioids | E9350, E9351, E9352, E9401                            | T400X5A, T400X5D, T400X5S, T402X5A, T402X5D, T402X5S, T403X5A, T403X5D, T403X5S, T404X5A, T404X5D, T404X5S, T40605A, T40605D, T40605S, T40695A, T40695D, T40695S                                                                                                                                                                                                                         |
| Opioid poisoning           | 96500, 96501, 96502, 96509, 9701, E8500, E8501, E8502 | T400X1A, T400X1D, T400X1S, T400X4A, T400X4D, T400X4S, T401X1A, T401X1D, T401X1S, T401X4A, T401X4D, T401X4S, T402X1A, T402X1D, T402X1S, T402X4A, T402X4D, T402X4S, T403X1A, T403X1D, T403X1S, T403X4A, T403X4D, T403X4S, T404X1A, T404X1D, T404X1S, T404X4A, T404X4D, T404X4S, T40601A, T40601D, T40601S, T40604A, T40604D, T40604S, T40691A, T40691D, T40691S, T40694A, T40694D, T40694S |
| Opioid use, unspecified    |                                                       | F1190, F11920, F11921, F11922, F11929, F1193, F1194, F11950, F11951, F11959, F11981, F11982, F11988, F1199                                                                                                                                                                                                                                                                               |

Source: HCUP, CASE STUDY: Exploring How Opioid-Related Diagnosis Codes Translate from Icd-9-Cm To Icd-10-Cm. APPENDIX A. ICD-9-CM and ICD-10-CM Opioid-related Diagnosis Codes Used in this Study. Available at: <https://www.hcup-us.ahrq.gov/datainnovations/ICD-10CaseStudyonOpioid-RelatedIPStays042417.pdf>

Appendix 3 -Variance-ratio test of covariate before and after matching

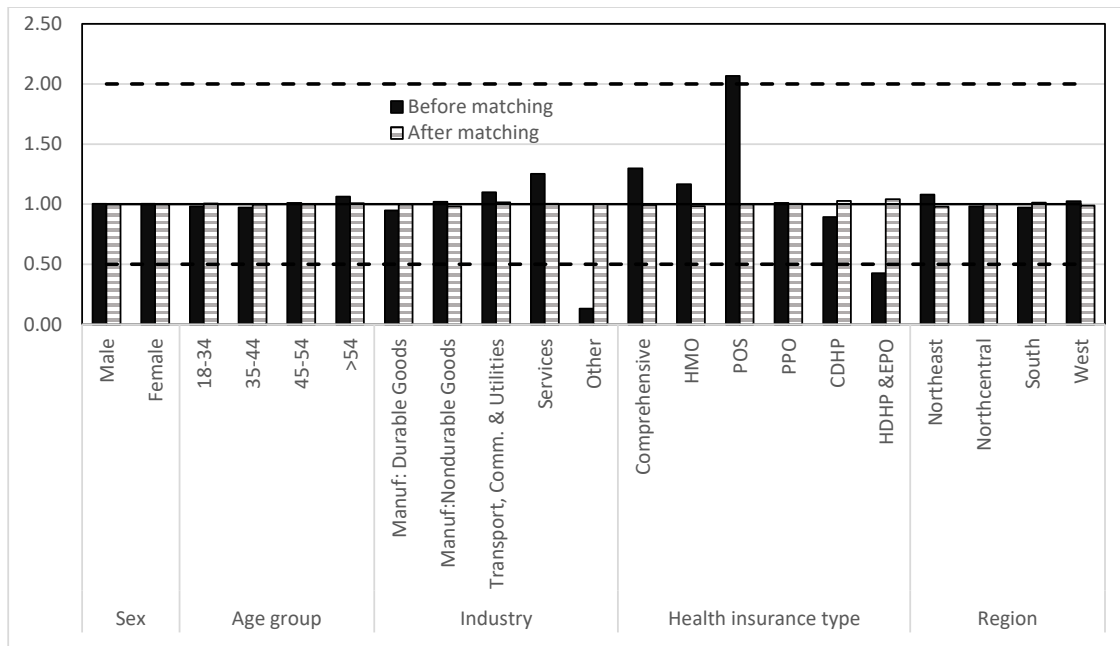

The bars are overlaid by lines equal to 0.5 and 2. Variance ratios are considered out of balance if the ratios are out of these lines.
